# Supplementary material
Source: PubMed Central journal article supplement (PMC8571764)
Supplement: ONCO-26-e2090-s001.pdf [file ONCO-26-e2090-s001.pdf]

Supplemental Table for:  
Knowledge about risks, benefits, and curative potential of immunotherapy among patients with advanced cancer  
Laura Petrillo et al.

### Supplement: Immunotherapy Knowledge Survey

*Instructions: For each of the following items, please indicate if it is true, false, or you do not know.*

1. Immunotherapy and chemotherapy both work by killing all rapidly dividing cells.
2. Immunotherapy may be given alone, in combination with other immunotherapies, or with chemotherapy.
3. Immunotherapy side effects are always mild and reversible.
4. Immunotherapy is a pill you take by mouth.
5. Immunotherapy side effects can affect any organ in the body.
6. People who have side effects from immunotherapy may need take steroids or other medications to suppress the immune system.
7. Side effects from immunotherapy can occur at any time, even after the treatment ends.
8. Immunotherapy works by turning on your body's immune system to recognize and attack cancer cells.
9. Immunotherapy stops cancer from growing in every patient who is treated with it.
